# Supplementary material
Source: PubMed Central journal article supplement (PMC2881745)
Supplement: supp_M109.089425_jbc.M109.089425-1.pdf [file supp_M109.089425_jbc.M109.089425-1.pdf]

## Supplemental figure legends

### **Fig S1. Hantavirus RNA synthesis.**

For mRNA synthesis (left side), a capped primer 10-20 nt in length is cleaved from a host mRNA after a G residue, and this G is aligned opposite the template C at position +3. After its extension to ...**GUAG**<sub>OH</sub>, the primer can be extended without realignment to produce a mRNA in which exactly one 5' UAG repeat has been deleted (2<sup>nd</sup> level on left side). The same primer can also be realigned before extension; to produce a “wt” mRNA with all three UAG repeats (3<sup>rd</sup> level on left side). If the same primer is cleaved a 2<sup>nd</sup> time (after realignment) by the cap-dependent, G-specific endonuclease, the remaining fragment (5' **pUAG**) can be used to prime antigenome synthesis (left side red arrow). Alternatively, antigenome synthesis can be initiated by GTP opposite the C at position +3 at the 3' end of the genome template (right side). After its extension to **pppGUAG**<sub>OH</sub> and realignment on the genome template, the pppG can be cleaved by the G-specific endonuclease acting in a cap-independent fashion, to generate the pUAG 5' ends (right side). When the complementary ends of the genome anneal, the dsRNA so formed will have flush ends without the 5' triphosphate.

### **Fig S2. Non-denaturing PAGE analysis of gel-purified pppRNA1.**

<sup>32</sup>P-CTP-labelled, gel-purified pppRNA1 (T7-3G) synthesized in the presence of 5-biotin-UTP (Biotyn.), or its absence, was electrophoresed on 10% non-denaturing polyacrylamide gel, which was stained with ethidium bromide (below) and autoradiographed (above). Note that EtBr staining strongly over-estimates the amount of dsRNA present.

### **Fig S3. Interaction of differentially purified 5' ppp-RNA1s with RIG-I.**

500ng of minimally-purified (RNA1 biot.), PAGE purified (RNA1\* biot.), and PAGE + RNase III-treated (RNA1\*\* biot.) biotinylated RNA1s were bound to streptavidin beads and used to “pull down” either purified (his-tagged) RIG-I, or a vaccinia virus E3L-GST fusion protein, in the same pull-down assay; the E3L protein serving as a positive control (43). This comparison shows that the binding of RIG-I to the beads was due to the dsRNA by-products of the T7 reaction, rather than the 5' ppp-ssRNA.

### **Fig S4. Transfection controls**

Various synthetic ssRNAs (1 ug) and tRNA (3 ug) (as indicated on the left) were tested for their ability to activate IFN $\beta$ , when transfected into A549 cells by themselves. A 20' mer RNA annealed to 1 ug of 5' ppp-RNA1\*\* served as a positive control (lane 2).

**Fig S5A. RNase III resistance of Jun -1/60<sup>mod</sup> RNA.**

Equal amounts of Jun -1/60<sup>mod</sup> RNA were either untreated, mock-treated, or RNase III-treated, and then analyzed by non-denaturing (10%) PAGE, and stained with EtBr. Poly-I/C served as a positive control.

**Fig S5B. Formation of Junin dsRNA panhandles.**

600 ng of 5' ppp Jun -1/60<sup>mod</sup> RNA were annealed (or not) with the same amount of synthetic complementary oligonucleotides as indicated on the left. The RNA samples then analyzed by non-denaturing (10%) PAGE, and stained with EtBr.

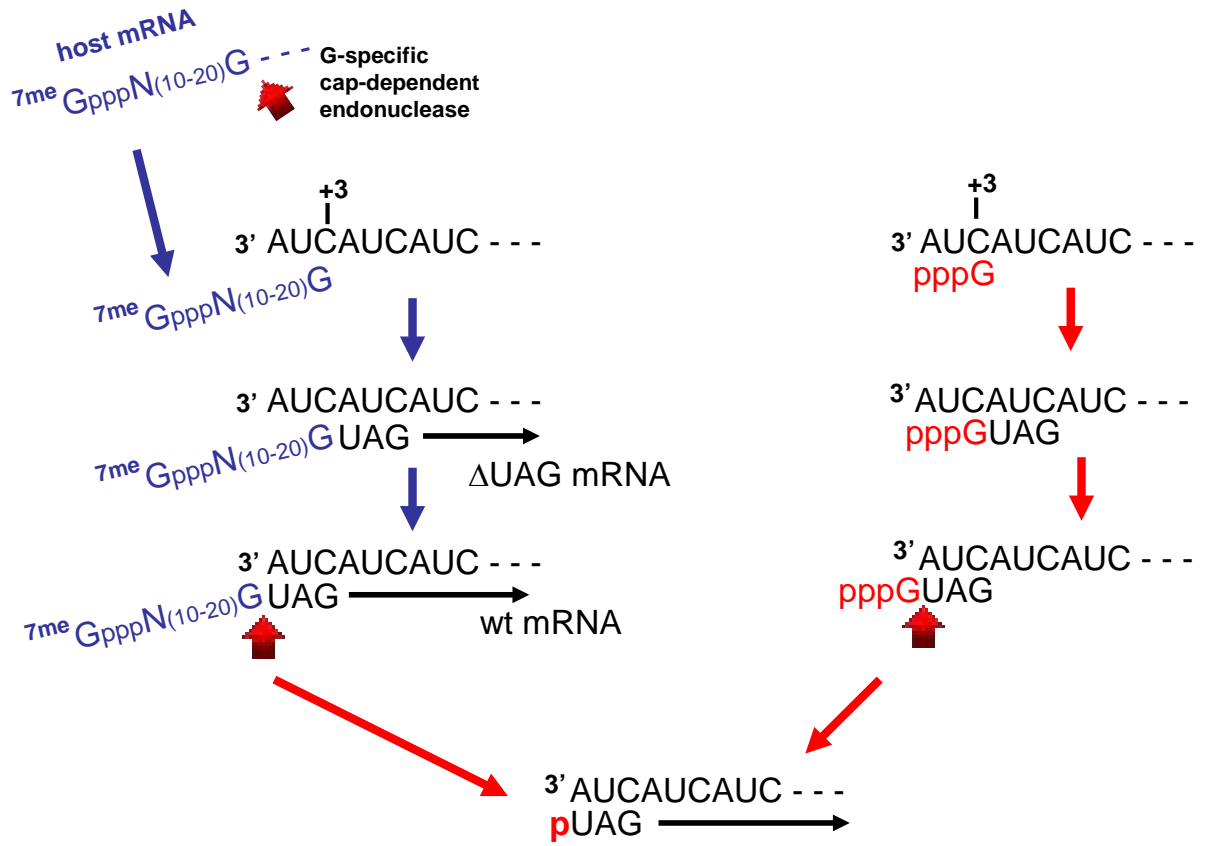

Marq et al. Fig. S1

T7-3G    T7-3G  
          Biotyn.

Autoradiography

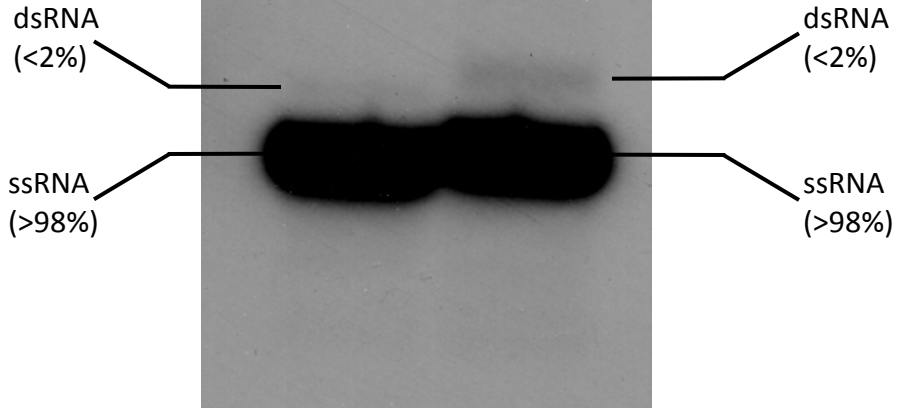

EtBr staining

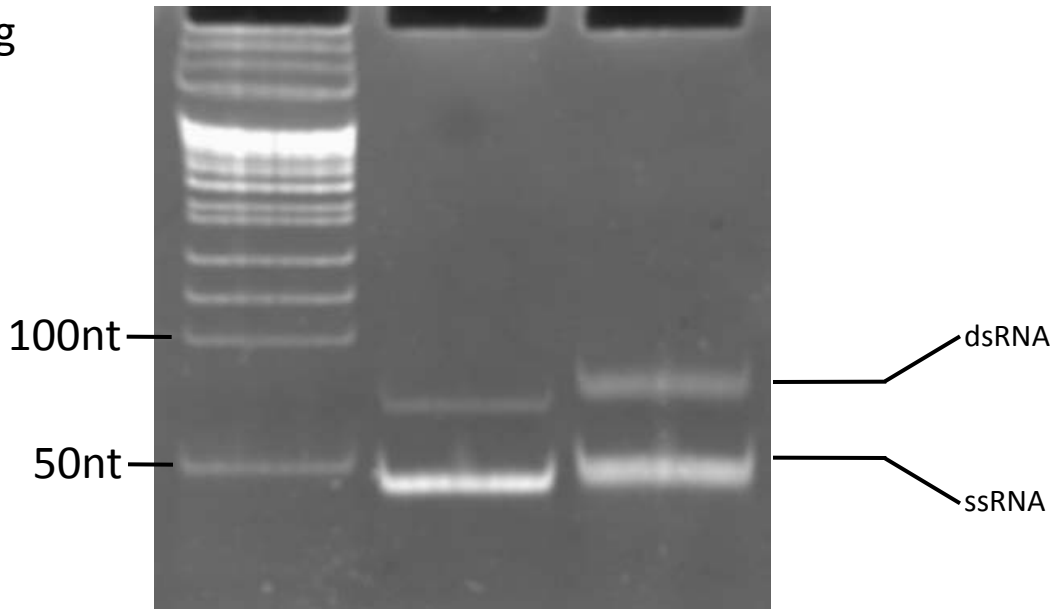

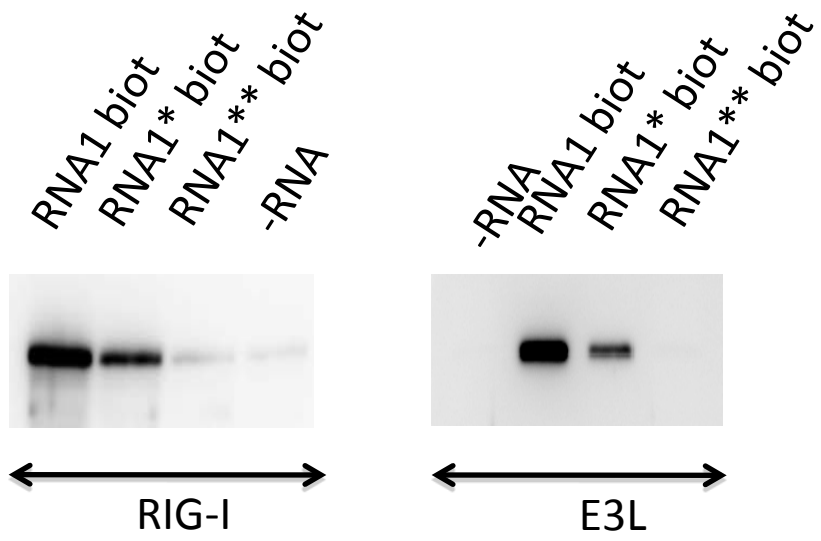

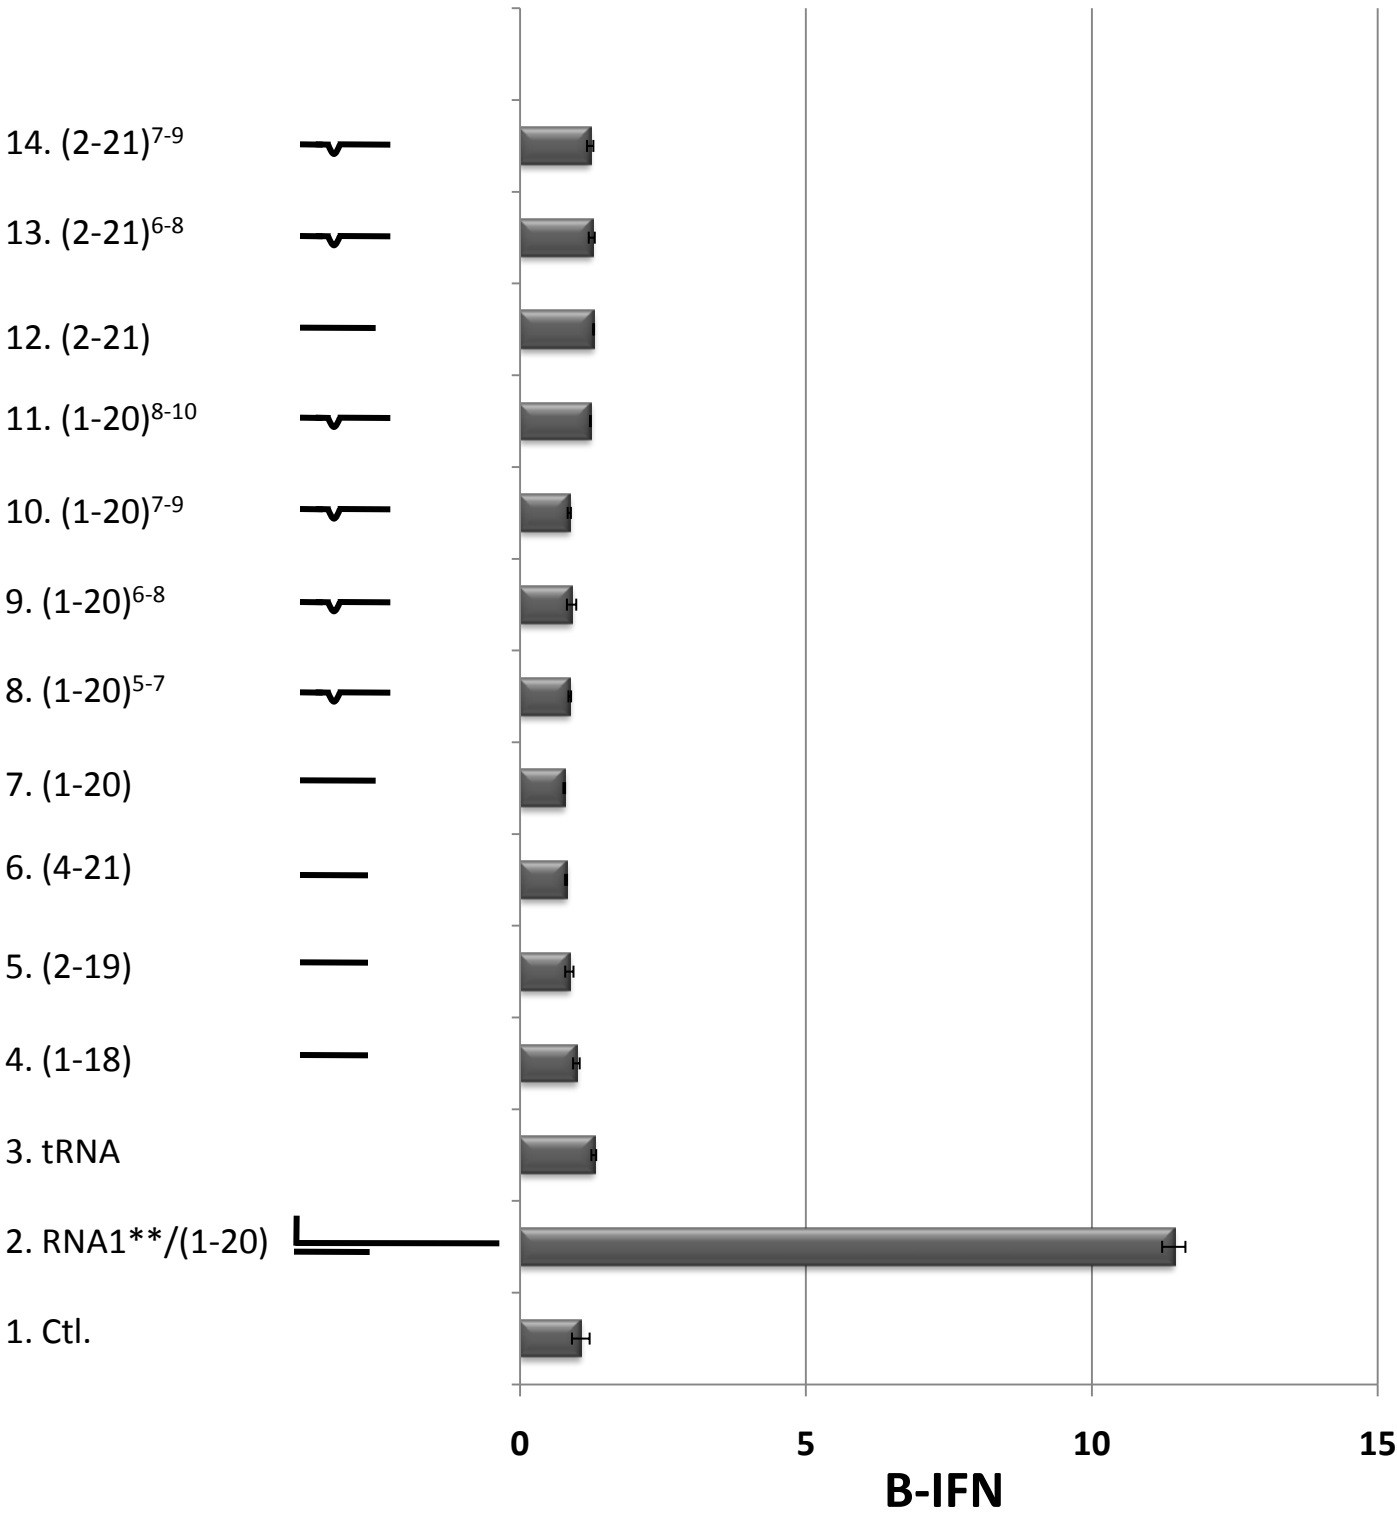

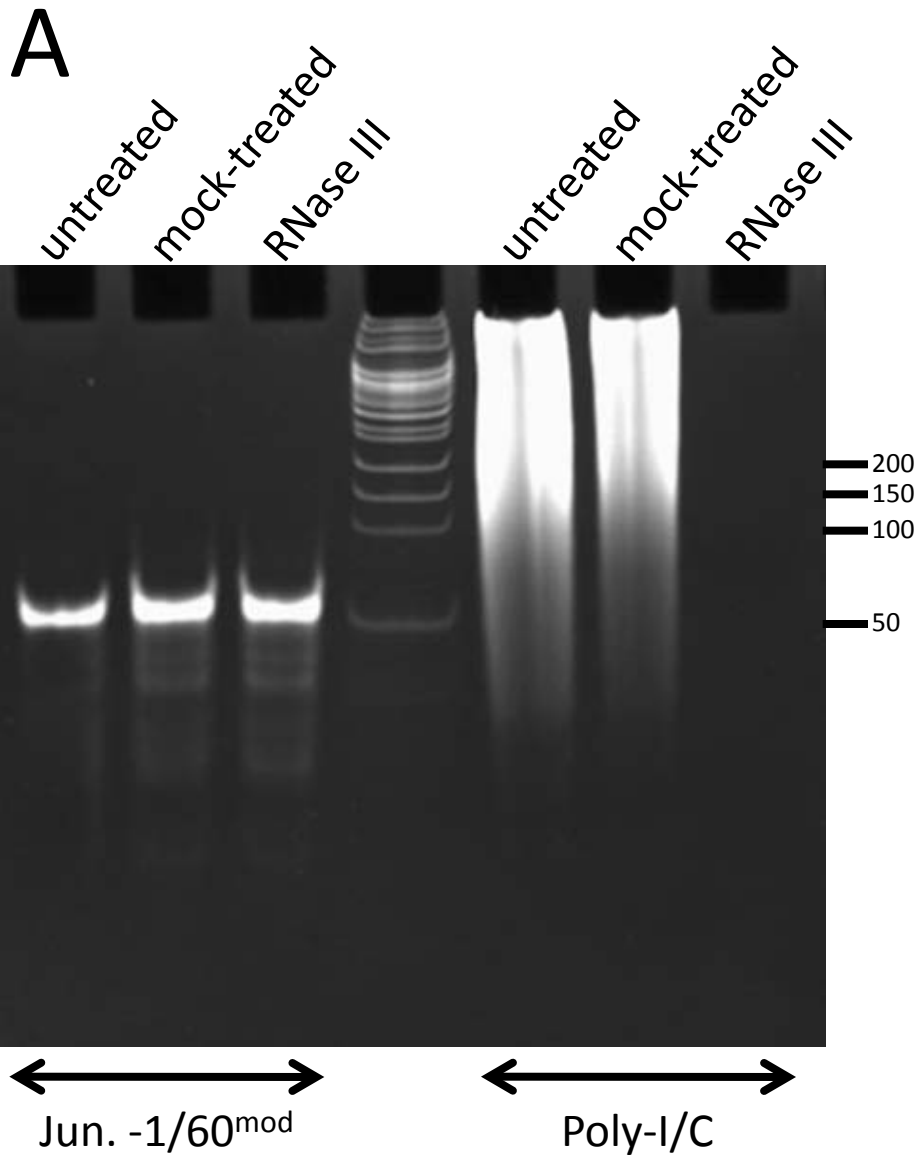

# B

Jun -1/60<sup>mod</sup>  
(+1/20)p

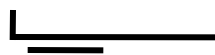

Jun -1/60<sup>mod</sup>  
(-1/20)p

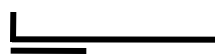

Jun -1/60<sup>mod</sup>  
(+1/20)

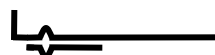

Jun -1/60<sup>mod</sup>  
(-1/20)

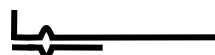

Jun -1/60<sup>mod</sup>

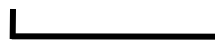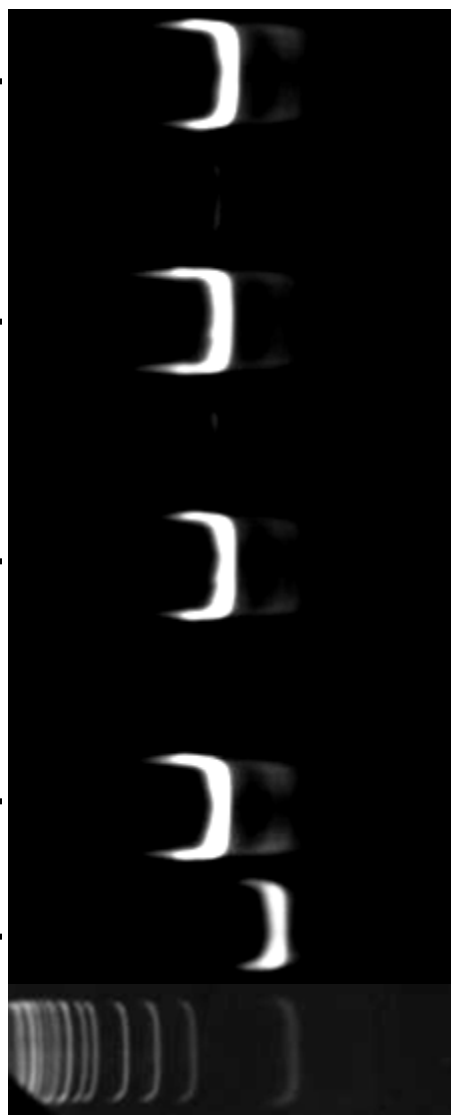

200  
150  
100  
50
